# Supplementary material
Source: PubMed Central journal article supplement (PMC10682943)
Supplement: jamainternmed-e236279-s003.pdf [file jamainternmed-e236279-s003.pdf]

## Data Sharing Statement

Yaffe. Effect of Personalized Risk-Reduction Strategies on Cognition and Dementia Risk Profile Among Older Adults. *JAMA Intern Med.* Published November 27, 2023.  
doi:10.1001/jamainternmed.2023.6279

### Data

**Data available:** Yes

**Data types:** Participant data with identifiers

**How to access data:** Data will be available upon request to the corresponding author. Data collected for the study, including anonymized data of individual participants and a data dictionary defining each field in the set, can be made available to others on reasonable request and after signing appropriate data sharing agreements. Please send data access requests to [Kristine.yaffe@ucsf.edu](mailto:Kristine.yaffe@ucsf.edu). Such requests must be approved by the respective ethics boards and appropriate data custodians.

**When available:** With publication

### Supporting Documents

**Document types:** None

### Additional Information

**Who can access the data:** Data will be available upon request to the corresponding author. Data collected for the study, including anonymized data of individual participants and a data dictionary defining each field in the set, can be made available to others on reasonable request and after signing appropriate data sharing agreements. Please send data access requests to [Kristine.yaffe@ucsf.edu](mailto:Kristine.yaffe@ucsf.edu). Such requests must be approved by the respective ethics boards and appropriate data custodians.

**Types of analyses:** Data will be available upon request to the corresponding author. Data collected for the study, including anonymized data of individual participants and a data dictionary defining each field in the set, can be made available to others on reasonable request and after signing appropriate data sharing agreements. Please send data access requests to [Kristine.yaffe@ucsf.edu](mailto:Kristine.yaffe@ucsf.edu). Such requests must be approved by the respective ethics boards and appropriate data custodians.

**Mechanisms of data availability:** Data will be available upon request to the corresponding author. Data collected for the study, including anonymized data of individual participants and a data dictionary defining each field in the set, can be made available to others on reasonable request and after signing appropriate data sharing agreements. Please send data access requests to [Kristine.yaffe@ucsf.edu](mailto:Kristine.yaffe@ucsf.edu). Such requests must be approved by the respective ethics boards and appropriate data custodians.
